# Supplementary material
Source: MDPI journal article supplement (https://www.mdpi.com/2073-4441/15/9/1701)
Supplement: s1 [file s1 › water-2347382-SI.pdf]

# Effects of climate change on streamflow in the Godavari Basin simulated using a conceptual model including CMIP6 dataset

Nagireddy Masthan Reddy <sup>1</sup>, Subbarayan Saravanan <sup>1</sup>, Hussein Almohamad <sup>2,\*</sup>, Ahmed Abdullah Al Dughairi <sup>2</sup> and Hazem Ghassan Abdo <sup>3</sup> 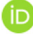

**Table S1.** Parameter values by default for the Sacramento model.

| Parameter | Description                                                                                                                                                     | Default | Min   | Max   |
|-----------|-----------------------------------------------------------------------------------------------------------------------------------------------------------------|---------|-------|-------|
| LZPK      | The ratio of water in LZFP, which drains as base flow each day.                                                                                                 | 0.01    | 0.001 | 0.015 |
| LZSK      | The ratio of water in LZFSM which drains as base flow each day.                                                                                                 | 0.05    | 0.03  | 0.2   |
| UZK       | The fraction of water in UZFWM, which drains as interflow each day.                                                                                             | 0.3     | 0.2   | 0.5   |
| UZW       | Upper Zone Tension Water Maximum.                                                                                                                               | 50      | 25    | 125   |
| UZFWM     | Upper Zone Free Water Maximum, this storage is the source of water for interflow and the driving force for transferring water to deeper depths.                 | 40      | 10    | 75    |
| LZW       | Lower Zone Tension Water Maximum.                                                                                                                               | 130     | 75    | 300   |
| LZFSM     | Lower Zone Free Water Supplemental Maximum                                                                                                                      | 25      | 15    | 300   |
| LZFP      | Lower Zone Free Water Primary Maximum                                                                                                                           | 60      | 40    | 600   |
| PFREE     | The minimum proportion of percolation from the upper zone to the lower zone directly available for recharging the lower zone free water stores.                 | 0.06    | 0     | 0.5   |
| REXP      | An exponent determining the rate of change of the percolation rate with changing lower zone water storage.                                                      | 1       | 0     | 3     |
| ZPERC     | The proportional increase in Pbase that defines the maximum percolation rate.                                                                                   | 40      | 0     | 80    |
| SIDE      | The ratio of non-channel baseflow (deep recharge) to channel (visible) baseflow.                                                                                | 0       | 0     | 0.8   |
| SSOUT     | The volume of the flow which can be conveyed by porous material in the bed of stream.                                                                           | 0       | 0     | 0.1   |
| PCTIM     | The permanently impervious fraction of the basin contiguous with stream channels, which contributes to direct runoff.                                           | 0.01    | 0     | 0.05  |
| ADIMP     | The additional fraction of the catchment which develops impervious characteristics under soil saturation conditions.                                            | 0       | 0     | 0.2   |
| SARVA     | A decimal fraction representing that portion of the basin normally covered by streams, lakes and vegetation that can deplete stream flow by evapotranspiration. | 0       | 0     | 0.1   |
| RSERV     | Fraction of lower zone free water unavailable for transpiration                                                                                                 | 0.3     | 0     | 0.4   |
| UH1       | The first component of the unit hydrograph                                                                                                                      | 1       | 0     | 1     |
| UH2       | The second component of the unit hydrograph                                                                                                                     | 0       | 0     | 1     |
| UH3       | The third component of the unit hydrograph                                                                                                                      | 0       | 0     | 1     |
| UH4       | The fourth component of the unit hydrograph                                                                                                                     | 0       | 0     | 1     |
| UH5       | The fifth component of the unit hydrograph                                                                                                                      | 0       | 0     | 1     |

**Table S2.** Parameter values by default for the AWBM model.

| Parameter         | Description                     | Default | Min | Max |
|-------------------|---------------------------------|---------|-----|-----|
| K <sub>Surf</sub> | Surface flow recession constant | 0.35    | 0   | 1   |
| K <sub>Base</sub> | Base flow recession constant    | 0.95    | 0   | 1   |
| C3                | Capacity surface store 3(in mm) | 150     | 0   | 500 |
| C2                | Capacity surface store 2(in mm) | 70      | 0   | 200 |
| C1                | Capacity surface store 1(in mm) | 7       | 0   | 50  |
| BFI               | Base flow index                 | 0.35    | 0   | 1   |
| A2                | Partial area of surface store 2 | 0.433   | 0   | 1   |
| A1                | Partial area of surface store 1 | 0.134   | 0   | 1   |

**Table S3.** Parameter values by default for the Tank model.

| Parameter                                                                                                     | Minimum | Default value | Maximum |
|---------------------------------------------------------------------------------------------------------------|---------|---------------|---------|
| First outlet height of the first tank ( $H_{11}$ ) (in mm)                                                    | 0       | 0             | 500     |
| Second outlet height of first tank ( $H_{12}$ ) (in mm)                                                       | 0       | 0             | 300     |
| First outlet height of second, third, and fourth tanks ( $H_{21}$ , $H_{31}$ , and $H_{41}$ ) (in mm)         | 0       | 0             | 100     |
| Coefficient of runoff from various tanks outlets ( $a_{11}$ , $a_{12}$ , $a_{21}$ , $a_{31}$ , and $a_{41}$ ) | 0       | 0.2           | 1       |
| Coefficient of Evaporation ( $\alpha$ )                                                                       | 0       | 0.1           | 1       |
| coefficient of infiltration in tanks 1,2, and 3 ( $b_1$ , $b_2$ , and $b_3$ )                                 | 0       | 0.2           | 1       |
| Tanks water level ( $C_1$ , $C_2$ , $C_3$ , and $C_4$ ) (in mm)                                               | 0       | 20            | 100     |

**Table S4.** Default SimHyd model parameter values.

| Parameter                            | minimum | Default value | maximum |
|--------------------------------------|---------|---------------|---------|
| Coefficient of baseflow              | 0.0     | 0.3           | 1.0     |
| Impervious Threshold                 | 0       | 1             | 5       |
| Coefficient of Infiltration          | 0       | 200           | 400     |
| Infiltration Shape                   | 0       | 3             | 10      |
| Coefficient of Interflow             | 0.0     | 0.1           | 1.0     |
| Pervious Fraction                    | 0.0     | 0.9           | 1.0     |
| Rainfall Interception Store Capacity | 0.0     | 1.5           | 5.0     |
| Coefficient of recharge              | 0.0     | 0.2           | 1.0     |
| Soil Moisture Store Capacity         | 1       | 320           | 500     |

### Sacramento

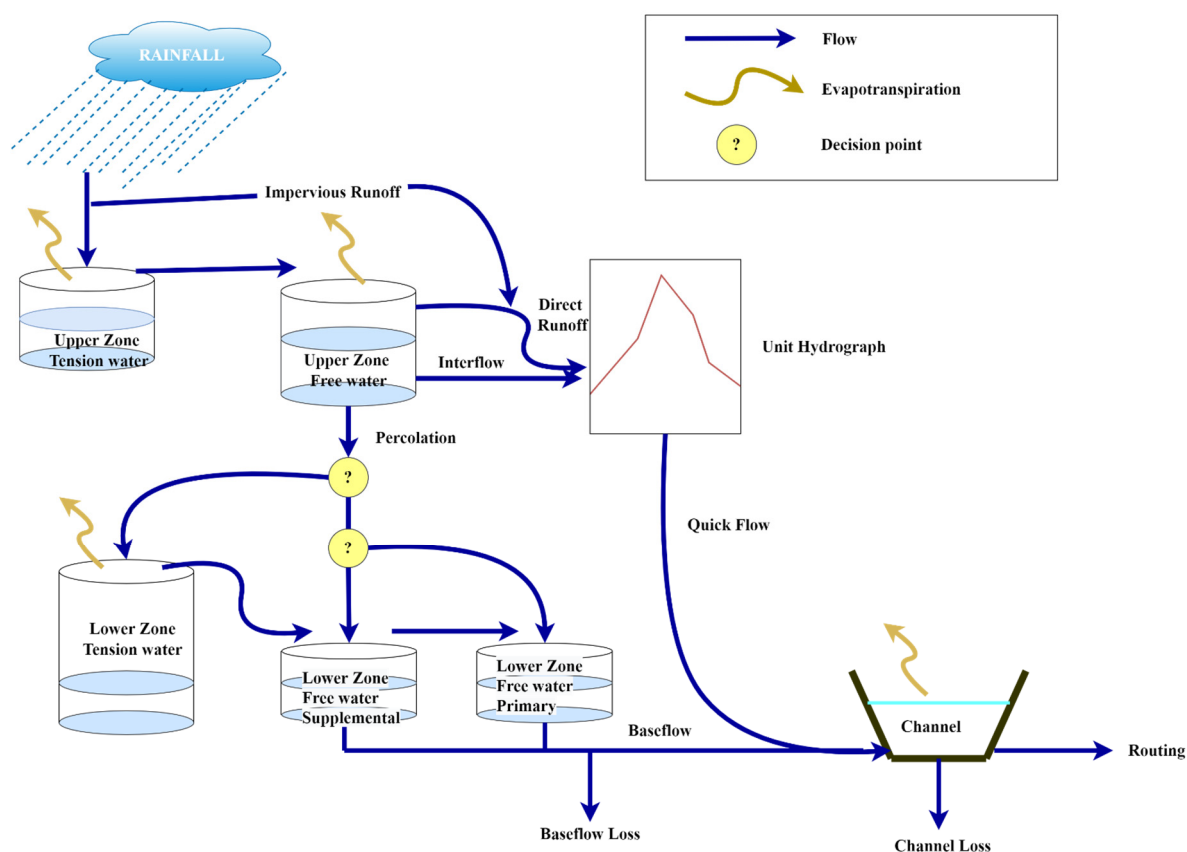**Figure S1.** Schematic representation of the Sacramento model (Source: Reddy et al. (2023)).

## AWBM

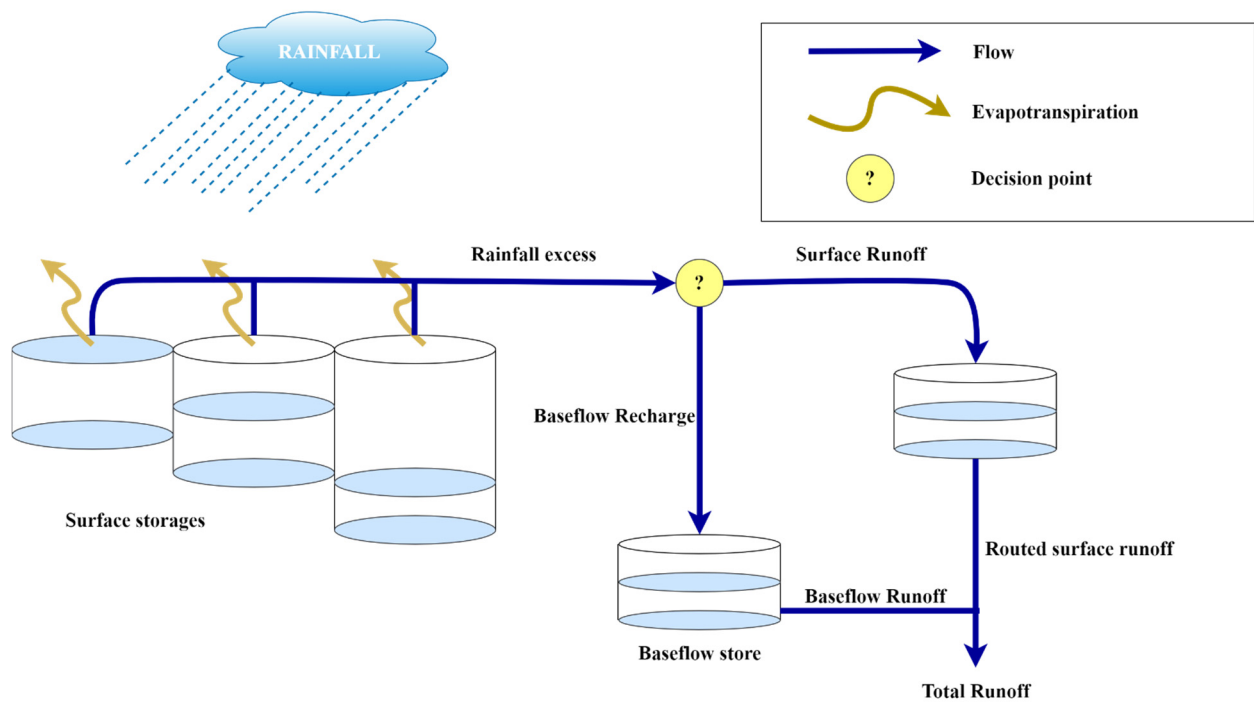

**Figure S2.** Schematic representation of AWBM model.

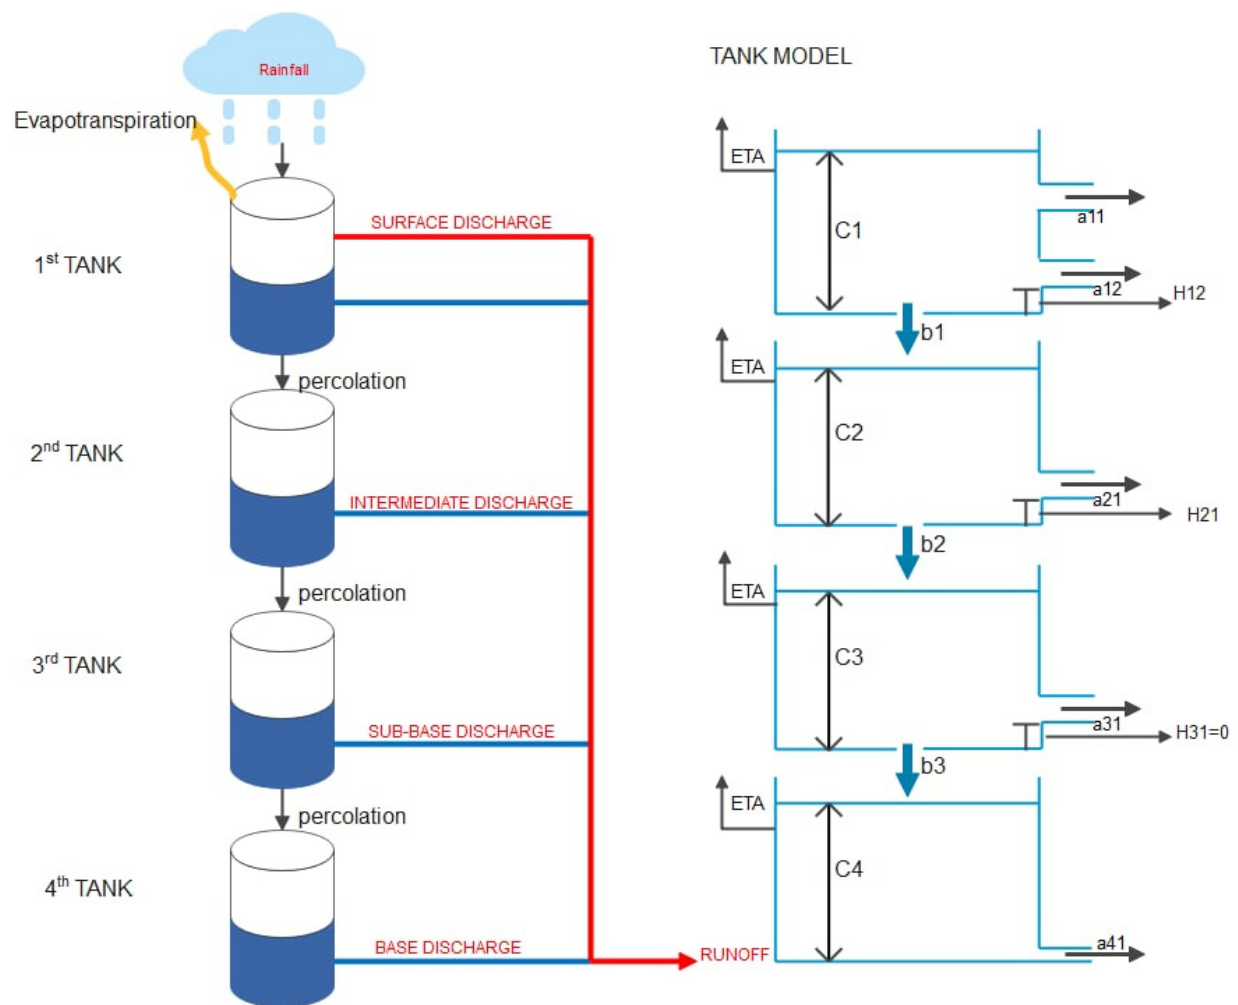

**Figure S3.** Schematic representation of the TANK model (Source: Reddy et al. (2023b)).

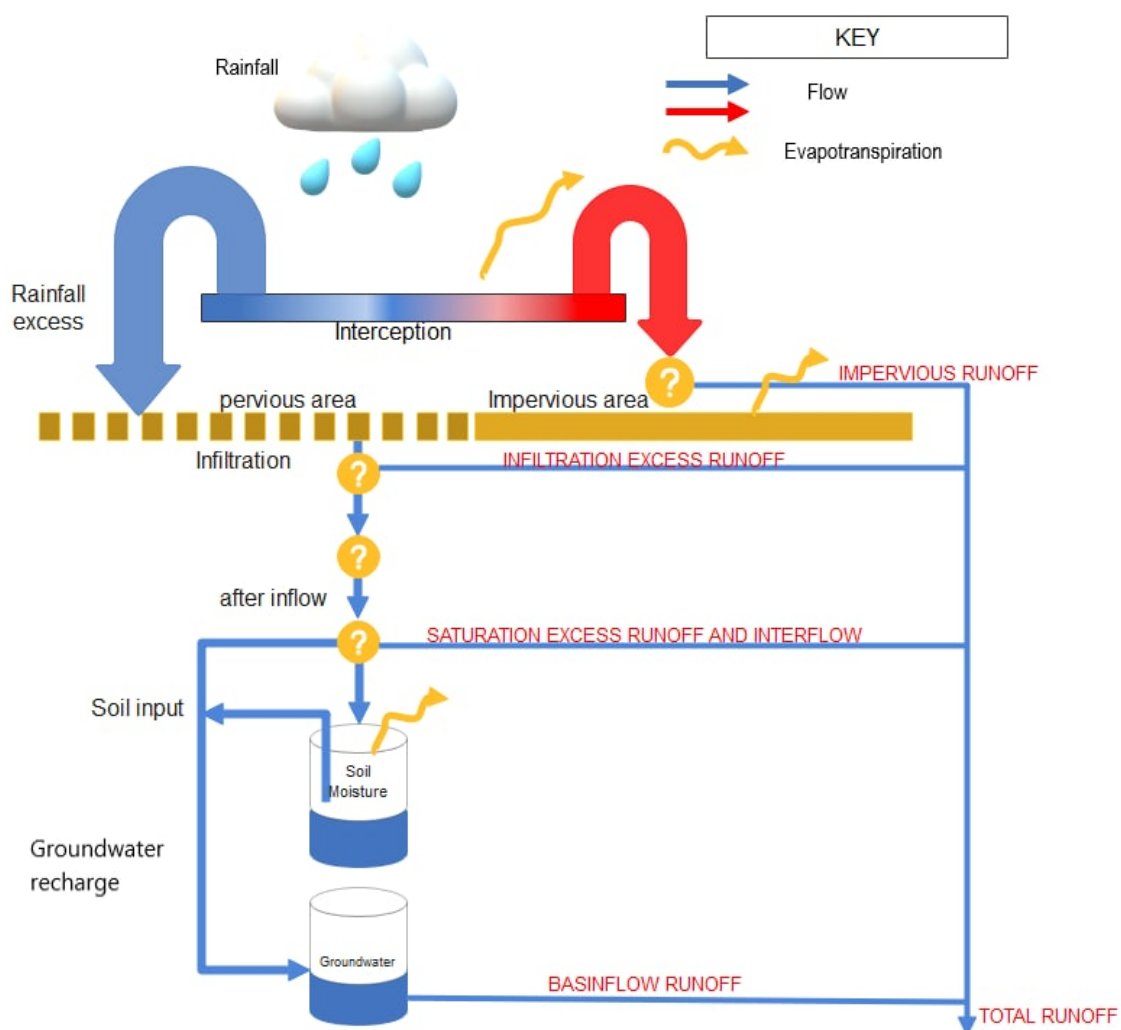

**Figure S4.** Schematic representation of SIMHYD model.

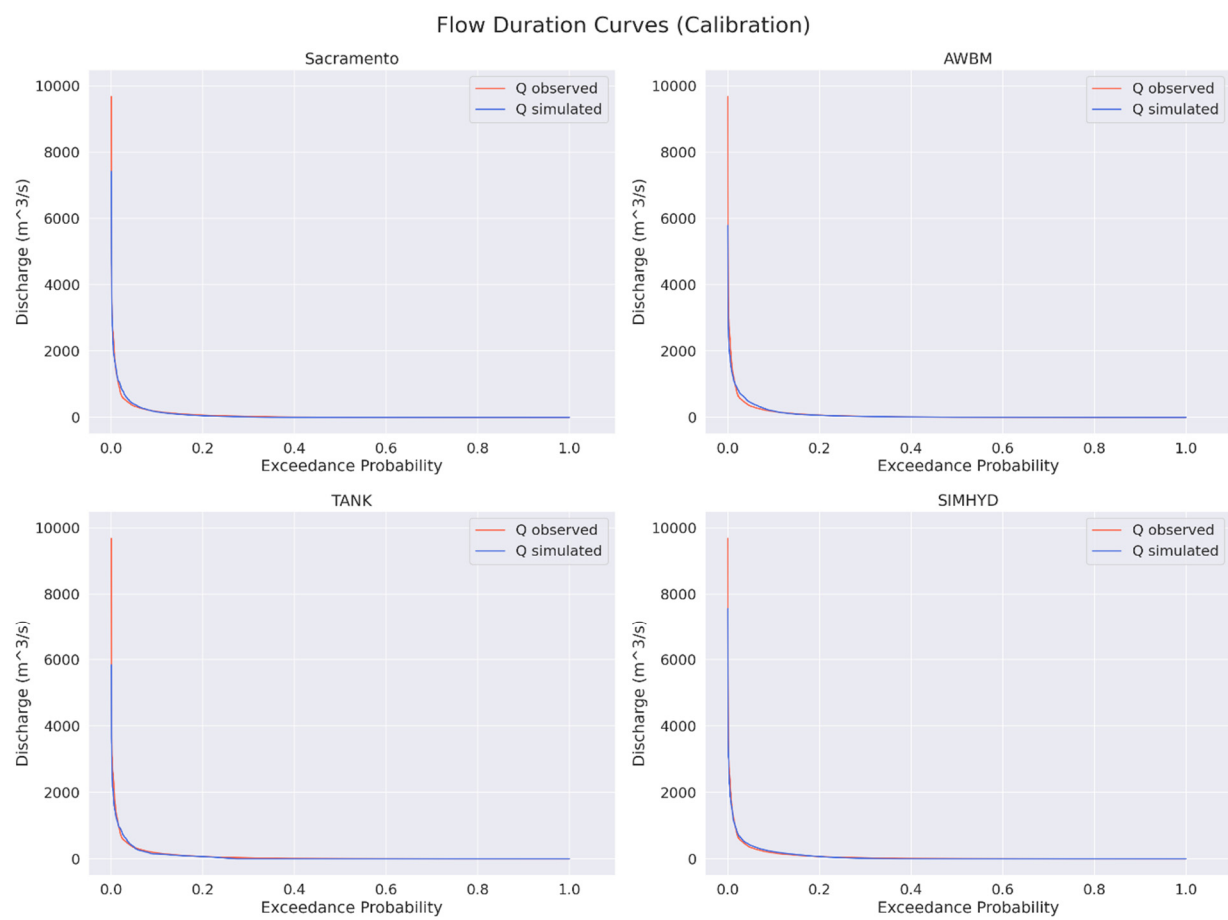

**Figure S5.** Flow duration curve for Observed vs. simulated streamflow for Sacramento, AWBM, TANK, and SIMHYD models during calibration.

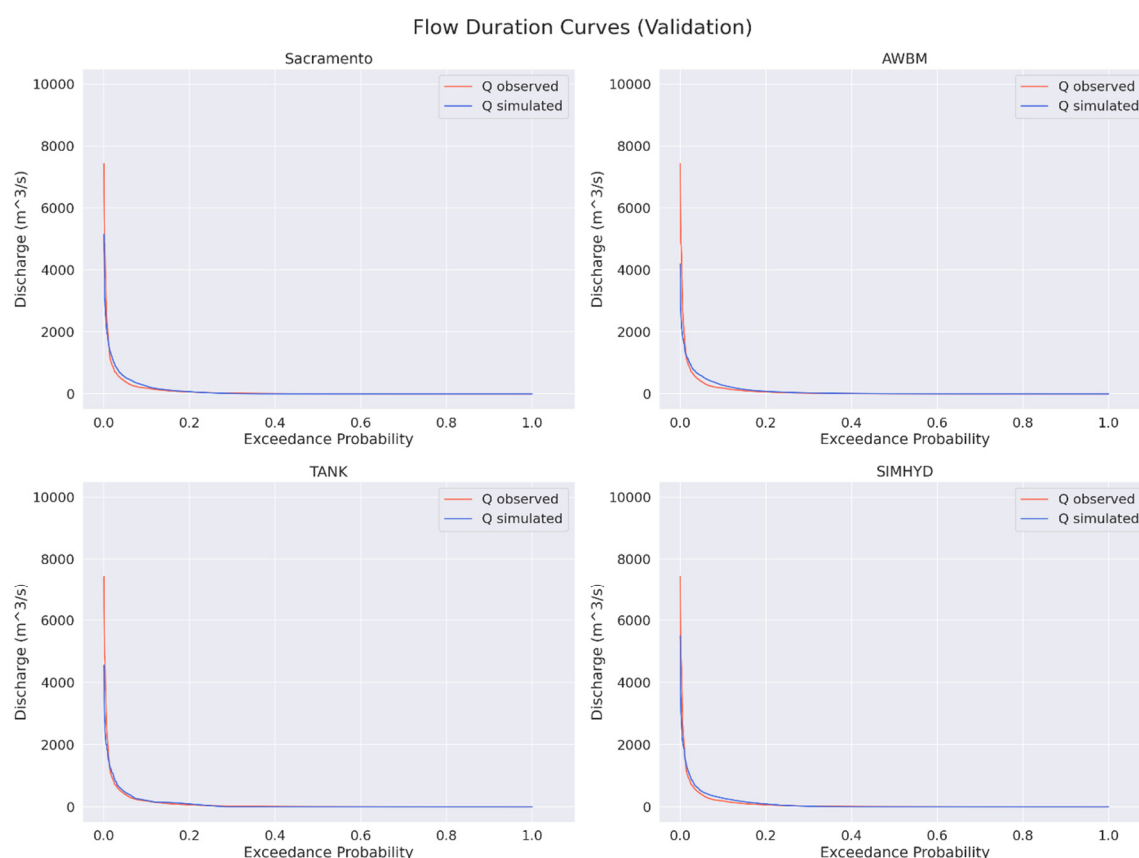

**Figure S6.** Flow duration curve for Observed vs. simulated streamflow for Sacramento, AWBM, TANK, and SIMHYD models during calibration.

### Monthly rainfall projections

Figure 15a shows that the monthly rainfall during historical and SSP126 scenario future projections varies significantly across different time periods. Between January and May, there is not much variation in rainfall. However, in June, there has been a downward trend in precipitation over time, with the historical amount of 177.85 decreasing to 75.26 in the far future. In July, there is mostly no change in the near future, but an increasing trend in the middle and far future. August exhibits an increasing trend, with the Middle Future period having the highest rainfall of 528.83 mm and the Historical period having the lowest at 352.39 mm. September shows an increasing trend, with the Middle Future period having the highest rainfall of 293.24 mm and the Far Future period having the lowest at 265.83 mm. In October, there is a variation, with the Middle Future period having the highest rainfall of 75.77 mm and the Historical period having the lowest at 47.26 mm. In November, there is a variation, with the Middle Future period having the highest rainfall of 30.43 mm and the Historical period having the lowest at 9.27 mm. In December, there is a variation, with the Middle Future period having the highest rainfall of 29.82 mm and the Historical period having the lowest at 7.67 mm.

Figure 15b represents the monthly rainfall during historical and SSP245 scenario future projections. Like the SSP126 scenario, there is not much fluctuation in rainfall between January and May. In June, the Historical era had the maximum rainfall at 177.85 mm and the Near Future the lowest at 70.62 mm. July has the highest Middle Future rainfall at 525.65 mm and the lowest Near Future rainfall at 491.75 mm. August had the greatest middle Future rainfall at 494.69 mm and the lowest Historical rainfall at 352.39 mm. September had the highest far-future rainfall at 300.70 mm and the lowest historical rainfall at 195.66 mm. The Historical era had 47.26 mm of rainfall in October, while the Middle Future had 90.80 mm. In November, rainfall is low in the Historical and Near Future eras

(9.27 mm and 20.60 mm) but high in the Middle and Far Future (19.29 mm and 26.24 mm). In December, the Historical and Near Future eras had 7.67 mm and 20.31 mm of rainfall, respectively, while the Middle and Far Future periods had 24.36 and 41.41 mm.

Figure 15c illustrates the monthly rainfall predictions for both historical data and the SSP370 scenario. There appears to be a slight change in the trend from January to May, but overall, an increase in rainfall is expected. In June, the historical average rainfall is 177.85 mm, which reduces to 56.31 mm in the near future, increases to 106.51 mm in the middle future, and then slightly decreases to 46.80 mm in the far future. In July, there was a decrease to 499.35 mm before rising to 596.27 mm. In August, there is a rise to 526.74 mm in the near future, followed by a drop to 523.24 mm in the middle future and 588.83 mm in the far future. September's historical average rainfall is 195.66 mm, increasing to 282.94 mm in the near future and 351.00 mm in the distant future. In October, there is a rise to 75.36 mm in the near future and 112.96 mm in the far future. In November, the historical average rainfall is 9.27 mm, which rises to 40.70 mm in the near future, drops to 21.51 mm in the intermediate future, and rises again to 46.87 mm in the distant future. Finally, in December, the historical average rainfall is 7.67 mm, which increases to 29.06 mm in the near future and then declines to 27.68 mm in the far future.

Figure 15d displays the monthly rainfall for both historical data and the projected SSP585 scenario estimates. In January, the historical average rainfall is 13.17 mm, increasing to 31.38 mm in the far future. February's historical average is 10.26 mm, which could decrease to 5.15 mm in the near future before increasing to 14.93 mm in the far future. In June, the historical average is 177.85 mm, which decreases significantly to 70.62 mm in the near future before increasing significantly to 140.52 mm in the middle future and slightly decreasing to 58.72 mm in the far future. In July, the historical average is 418.90 mm, which slightly decreases in the near future to 491.75 mm before increasing further to 679.12 mm in the far future. September's historical average is 195.66 mm, significantly increasing to 349.69 mm in the future. Finally, in December, the historical average is 7.67 mm of rainfall, significantly increasing to 41.41 mm in the far future.

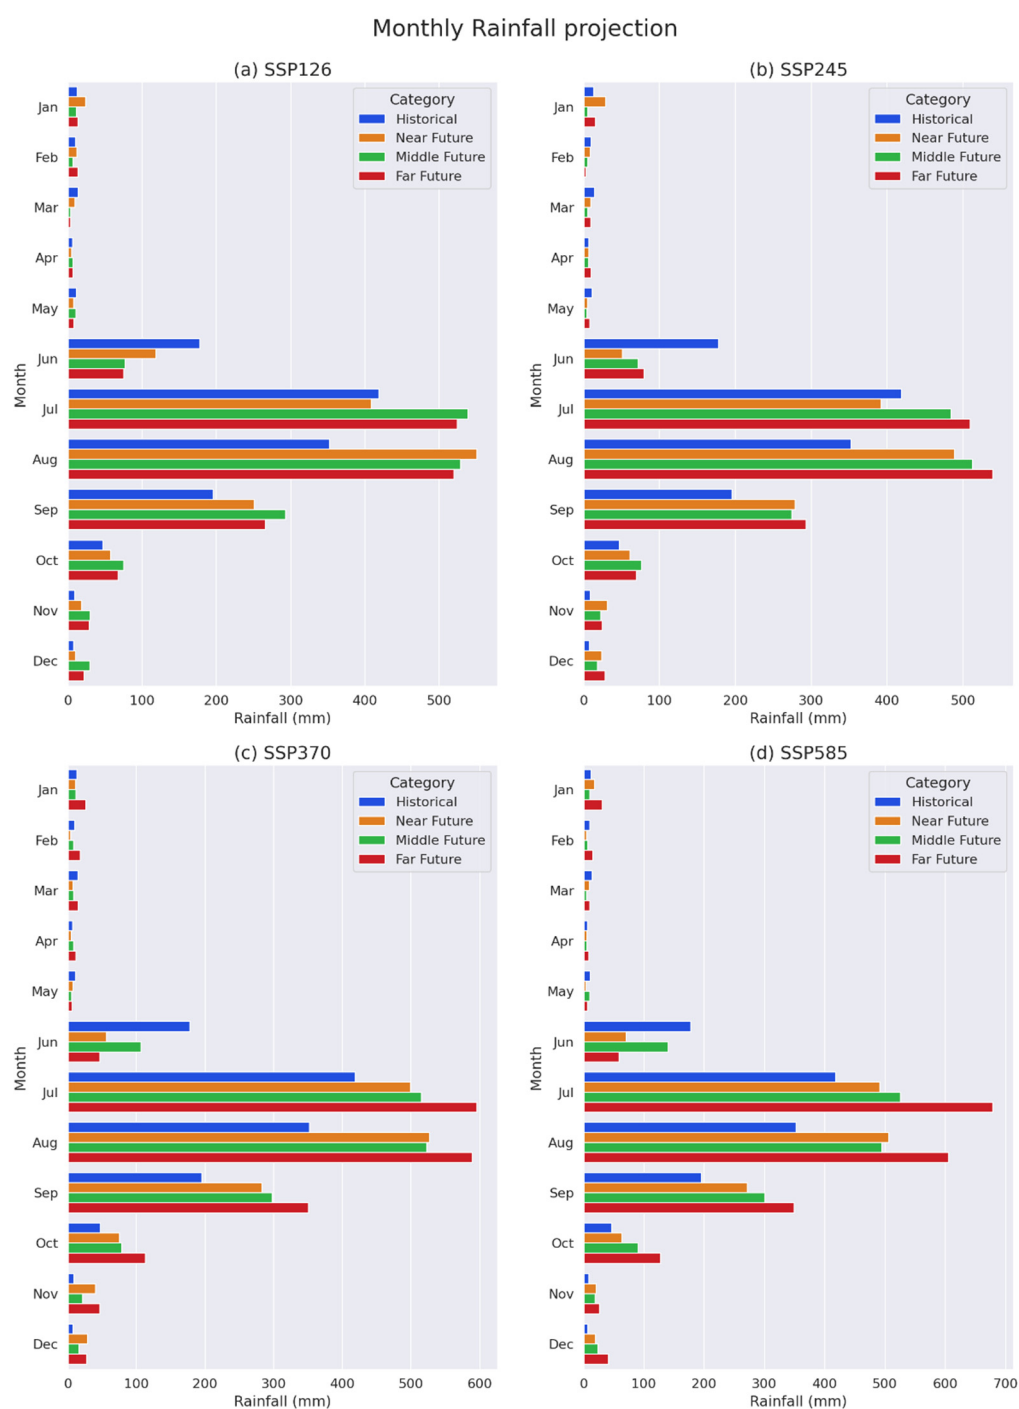

**Figure S7.** Monthly rainfall projections for SSP126, SSP245, SSP370 and SSP585 scenarios.

**Table S5.** Descriptive statistics for the dataset during Calibration and Validation.

|                         | <b>Calibration</b> |             |                      |            |                   |
|-------------------------|--------------------|-------------|----------------------|------------|-------------------|
|                         | <i>Tmin</i>        | <i>Tmin</i> | <i>Precipitation</i> | <i>Eto</i> | <i>Streamflow</i> |
| Mean                    | 19.73577           | 32.72572    | 3.470734             | 4.892049   | 81.29791          |
| Standard Error          | 0.061295           | 0.054857    | 0.11774              | 0.014291   | 3.480582          |
| Median                  | 21.76              | 31.57691    | 0                    | 4.467783   | 5.345             |
| Mode                    | 23.9               | 31.51       | 0                    | 3.50683    | 0                 |
| Standard Deviation      | 5.500849           | 4.923129    | 10.5665              | 1.282557   | 312.3616          |
| Sample Variance         | 30.25934           | 24.2372     | 111.6509             | 1.644953   | 97569.8           |
| Kurtosis                | -0.80811           | -0.40187    | 70.74959             | -0.61043   | 202.2821          |
| Skewness                | -0.47736           | 0.632263    | 6.669793             | 0.730815   | 11.24418          |
| Range                   | 27.67              | 27.27       | 226.0968             | 6.166989   | 9681.6            |
| Minimum                 | 4.55               | 18.63       | 0                    | 2.232336   | 0                 |
| Maximum                 | 32.22              | 45.9        | 226.0968             | 8.399326   | 9681.6            |
| Sum                     | 158951.9           | 263573      | 27953.29             | 39400.56   | 654773.4          |
| Count                   | 8054               | 8054        | 8054                 | 8054       | 8054              |
| Confidence Level(95.0%) | 0.120154           | 0.107535    | 0.230802             | 0.028015   | 6.822841          |
|                         | <b>Validation</b>  |             |                      |            |                   |
|                         | <i>Tmin</i>        | <i>Tmax</i> | <i>Precipitation</i> | <i>Eto</i> | <i>Streamflow</i> |
| Mean                    | 19.57438           | 32.60527    | 3.432879             | 4.895996   | 95.14656          |
| Standard Error          | 0.089862           | 0.081061    | 0.162447             | 0.02097    | 6.73403           |
| Median                  | 21.41              | 31.34       | 0                    | 4.473222   | 5                 |
| Mode                    | 23.37              | 31.52       | 0                    | 3.50683    | 0                 |
| Standard Deviation      | 5.431293           | 4.899341    | 9.818286             | 1.267422   | 407.0051          |
| Sample Variance         | 29.49895           | 24.00354    | 96.39874             | 1.606357   | 165653.2          |
| Kurtosis                | -0.89979           | -0.27926    | 54.41726             | -0.52955   | 115.3684          |
| Skewness                | -0.38936           | 0.685836    | 6.014272             | 0.766457   | 9.647078          |
| Range                   | 26.31              | 27.68       | 160.3247             | 6.098484   | 7431              |
| Minimum                 | 4.82               | 18.17       | 0                    | 2.256467   | 0                 |
| Maximum                 | 31.13              | 45.85       | 160.3247             | 8.354951   | 7431              |
| Sum                     | 71505.2            | 119107.1    | 12540.31             | 17885.07   | 347570.4          |
| Count                   | 3653               | 3653        | 3653                 | 3653       | 3653              |
| Confidence Level(95.0%) | 0.176186           | 0.15893     | 0.318495             | 0.041114   | 13.20283          |

**Table S6.** Calibrated parameters for all conceptual models.

| Sacramento |         | AWBM              |         | TANK  |         | SIMHYD                         |         |
|------------|---------|-------------------|---------|-------|---------|--------------------------------|---------|
| ADIMP      | 0.031   | A1                | 0.134   | H11   | 119.608 | baseflow Coefficient           | 0.373   |
| LZFPM      | 49.608  | A2                | 0.433   | a11   | 0.169   | impervious Threshold           | 4.431   |
| LZFSM      | 49.608  | BFI               | 0.298   | a12   | 0.204   | infiltration Coefficient       | 371.765 |
| LZPK       | 0.118   | C1                | 1.569   | a21   | 0.812   | infiltration Shape             | 0.196   |
| LZSK       | 0.729   | C2                | 130.196 | a31   | 0.847   | interflow Coefficient          | 0.000   |
| LZTWM      | 117.647 | C3                | 252.941 | a41   | 0.478   | pervious Fraction              | 1.000   |
| PCTIM      | 0.000   | K <sub>Base</sub> | 0.561   | alpha | 1.000   | rainfall Interception Capacity | 4.569   |
| PFREE      | 0.184   | K <sub>Surf</sub> | 0.627   | b1    | 0.031   | recharge Coefficient           | 0.741   |
| REXP       | 1.529   |                   |         | b2    | 0.337   | soil Moisture Store Capacity   | 169.290 |
| RSERV      | 0.300   |                   |         | b3    | 0.027   |                                |         |
| SARVA      | 0.010   |                   |         | C1    | 51.765  |                                |         |
| SIDE       | 0.000   |                   |         | C2    | 18.824  |                                |         |
| SSOUT      | 0.001   |                   |         | C3    | 52.549  |                                |         |
| UZFWM      | 79.373  |                   |         | C4    | 26.667  |                                |         |
| UZK        | 0.737   |                   |         | H12   | 101.315 |                                |         |
| UZTWM      | 65.098  |                   |         | H21   | 14.118  |                                |         |
| ZPERC      | 67.765  |                   |         | H31   | 78.824  |                                |         |
|            |         |                   |         | H41   | 51.765  |                                |         |
